# Supplementary material
Source: MDPI journal article supplement (https://www.mdpi.com/1424-2818/14/1/6)
Supplement: s1 [file s1]

**Supplementary Material for the paper “Epibiotic communities of common crab species in the coastal Barents Sea: biodiversity and infestation patterns” by Alexander G. Dvoretzky, Vladimir G. Dvoretzky**

**Table S1.** Differences among the prevalences of associated organisms on great spider crabs (*Hyas araneus*), northern stone crabs (*Lithodes maja*), and red king crabs (*Paralithodes camtschaticus*) as revealed by Chi-square tests.

| <b>Taxa</b>                        | <b><i>Hyas</i></b> | <b><i>Lithodes</i></b> | <b><i>Paralithodes</i></b> | <b>Differences</b> |
|------------------------------------|--------------------|------------------------|----------------------------|--------------------|
| <b>Algae</b>                       |                    |                        |                            |                    |
| <i>Acrosiphonia</i> sp.            | 17.9 <sup>a</sup>  | 0 <sup>b</sup>         | 0 <sup>b</sup>             | Significant        |
| <i>Alaria esculenta</i>            | 5.1                | 0                      | 0                          | No                 |
| <i>Chordaria flagelliformis</i>    | 25.6 <sup>a</sup>  | 0 <sup>b</sup>         | 0 <sup>b</sup>             | Significant        |
| <i>Desmarestia aculeata</i>        | 12.8 <sup>a</sup>  | 0 <sup>b</sup>         | 0 <sup>b</sup>             | Significant        |
| <i>Dictyosiphon foeniculaceus</i>  | 23.1 <sup>a</sup>  | 0 <sup>b</sup>         | 0 <sup>b</sup>             | Significant        |
| <i>Laminaria digitata</i>          | 5.1                | 0                      | 0                          | No                 |
| <i>Palmaria palmata</i>            | 28.2 <sup>a</sup>  | 0 <sup>b</sup>         | 0 <sup>b</sup>             | Significant        |
| <i>Ptilota plumosa</i>             | 30.8 <sup>a</sup>  | 0 <sup>b</sup>         | 0 <sup>b</sup>             | Significant        |
| <i>Saccharina latissima</i>        | 10.3 <sup>a</sup>  | 0 <sup>b</sup>         | 0 <sup>b</sup>             | Significant        |
| <i>Ulvaria obscura</i>             | 23.1 <sup>a</sup>  | 0 <sup>b</sup>         | 0 <sup>b</sup>             | Significant        |
| <b>Hydrozoa</b>                    |                    |                        |                            |                    |
| <i>Coryne hincksii</i>             | 2.6                | 0                      | 0                          | No                 |
| <i>Halecium beanii</i>             | 2.6                | 0                      | 2.4                        | No                 |
| <i>Obelia geniculata</i>           | 10.3 <sup>a</sup>  | 48.6 <sup>b</sup>      | 4.8 <sup>a</sup>           | Significant        |
| <i>Obelia longissima</i>           | 17.9 <sup>a</sup>  | 94.6 <sup>b</sup>      | 66.7 <sup>c</sup>          | Significant        |
| <b>Turbellaria</b>                 |                    |                        |                            |                    |
| <i>Peraclistus oophagus</i>        | 23.1 <sup>a</sup>  | 0 <sup>b</sup>         | 0 <sup>b</sup>             | Significant        |
| <b>Nemertini</b>                   |                    |                        |                            |                    |
| Nemertini g. sp.                   | 10.3               | 10.8                   | 2.4                        | No                 |
| <b>Polychaeta</b>                  |                    |                        |                            |                    |
| <i>Bushiella (Jugaria) similis</i> | 0                  | 2.7                    | 0                          | No                 |
| <i>Circeis armoricana</i>          | 38.5               | 59.5                   | 33.3                       | No                 |
| <i>Eumida sanguinea</i>            | 0.0                | 5.4                    | 2.4                        | No                 |
| <i>Harmothoe imbricata</i>         | 0 <sup>a</sup>     | 70.3 <sup>b</sup>      | 33.3 <sup>c</sup>          | Significant        |
| <i>Lepidonotus squamatus</i>       | 0                  | 2.7                    | 0                          | No                 |
| <i>Placostegus tridentatus</i>     | 43.6 <sup>a</sup>  | 64.9 <sup>a</sup>      | 0 <sup>b</sup>             | Significant        |
| <i>Protula tubularia</i>           | 7.7                | 0                      | 0                          | No                 |
| <i>Spirobranchus triqueter</i>     | 20.5 <sup>a</sup>  | 8.1 <sup>ab</sup>      | 0 <sup>b</sup>             | Significant        |
| <b>Hirudinea</b>                   |                    |                        |                            |                    |
| <i>Crangonobdella fabricii</i>     | 0                  | 0                      | 2.4                        | No                 |
| <i>Johanssonia arctica</i>         | 0 <sup>a</sup>     | 2.7 <sup>ab</sup>      | 11.9 <sup>b</sup>          | Significant        |
| <i>Platibdella olriki</i>          | 2.6                | 0                      | 0                          | No                 |
| <b>Bivalvia</b>                    |                    |                        |                            |                    |
| <i>Heteranomia scuamula</i>        | 7.7 <sup>a</sup>   | 48.6 <sup>b</sup>      | 9.5 <sup>a</sup>           | Significant        |
| <i>Hiatella arctica</i>            | 0 <sup>a</sup>     | 13.5 <sup>b</sup>      | 4.8 <sup>a</sup>           | Significant        |
| <i>Mytilus edulis</i>              | 10.3 <sup>a</sup>  | 32.4 <sup>b</sup>      | 26.2 <sup>ab</sup>         | Significant        |
| <b>Gastropoda</b>                  |                    |                        |                            |                    |
| <i>Margarites</i> sp.              | 5.1                | 0                      | 0                          | No                 |
| <b>Copepoda</b>                    |                    |                        |                            |                    |
| <i>Calanus finmarchicus</i>        | 2.6                | 0                      | 0                          | No                 |
| <i>Ectinosoma neglectum</i>        | 25.6 <sup>a</sup>  | 2.7 <sup>b</sup>       | 0 <sup>b</sup>             | Significant        |
| <i>Harpacticus uniremis</i>        | 46.2 <sup>a</sup>  | 0 <sup>b</sup>         | 2.4 <sup>b</sup>           | Significant        |
| <i>Tisbe furcata</i>               | 30.8 <sup>a</sup>  | 8.1 <sup>b</sup>       | 2.4 <sup>b</sup>           | Significant        |
| <i>Zaus abbreviatus</i>            | 2.6                | 0                      | 0                          | No                 |

|                                 |                    |                   |                   |             |
|---------------------------------|--------------------|-------------------|-------------------|-------------|
| <b>Amphipoda</b>                |                    |                   |                   |             |
| <i>Ampelisca</i> sp.            | 0                  | 0                 | 2.4               | No          |
| <i>Gamarellus homari</i>        | 10.3               | 5.4               | 2.4               | No          |
| <i>Hippomedon propinquus</i>    | 5.1                | 0                 | 0                 | No          |
| <i>Ischyrocerus anguipes</i>    | 12.8 <sup>a</sup>  | 48.6 <sup>b</sup> | 52.4 <sup>b</sup> | Significant |
| <i>Ischyrocerus commensalis</i> | 5.1 <sup>a</sup>   | 94.6 <sup>b</sup> | 100 <sup>b</sup>  | Significant |
| <b>Cirripedia</b>               |                    |                   |                   |             |
| <i>Balanus balanus</i>          | 2.6 <sup>a</sup>   | 35.1 <sup>b</sup> | 4.8 <sup>a</sup>  | Significant |
| <i>Balanus crenatus</i>         | 0 <sup>a</sup>     | 32.4 <sup>b</sup> | 26.2 <sup>b</sup> | Significant |
| <i>Verruca stroemia</i>         | 2.6                | 0                 | 0                 | No          |
| <b>Bryozoa</b>                  |                    |                   |                   |             |
| <i>Bugula harmsworthi</i>       | 5.1                | 0                 | 0                 | No          |
| <i>Callopora lineata</i>        | 7.7 <sup>a</sup>   | 29.7 <sup>b</sup> | 4.8 <sup>a</sup>  | Significant |
| <i>Crisia denticulata</i>       | 0 <sup>a</sup>     | 10.8 <sup>b</sup> | 0 <sup>a</sup>    | Significant |
| <i>Lichenopora hispida</i>      | 7.7 <sup>a</sup>   | 27.0 <sup>b</sup> | 4.8 <sup>a</sup>  | Significant |
| <i>Lichenopora verrucaria</i>   | 15.4 <sup>a</sup>  | 13.5 <sup>a</sup> | 2.4 <sup>b</sup>  | Significant |
| <i>Porella smitti</i>           | 2.6                | 0                 | 0                 | No          |
| <i>Scrupocellaria arctica</i>   | 10.3 <sup>ab</sup> | 18.9 <sup>a</sup> | 4.8 <sup>b</sup>  | Significant |

Note. Different letters indicate significant differences (Chi-square test,  $p < 0.05$ )

**Table S2.** Differences among mean intensities of common associated organisms on great spider crabs (*Hyas araneus*), northern stone crabs (*Lithodes maja*), and red king crabs (*Paralithodes camtschaticus*) as revealed by Kruskal-Wallis tests followed by Bonferroni tests for medians.

| Taxa                            | <i>Hyas</i>            | <i>Lithodes</i>        | <i>Paralithodes</i>    | Differences |
|---------------------------------|------------------------|------------------------|------------------------|-------------|
| <b>Nemertini</b>                |                        |                        |                        |             |
| Nemertini g. sp.                | 15.8±10.1              | 4.3±2.6                | 1.0±0.0*               | No          |
| <b>Polychaeta</b>               |                        |                        |                        |             |
| <i>Circeis armoricana</i>       | 23.9±6.5 <sup>a</sup>  | 89.4±32.5 <sup>a</sup> | 5.3±2.3 <sup>b</sup>   | Significant |
| <i>Harmothoe imbricata</i>      | –                      | 1.3±0.2                | 1.4±0.2                | No          |
| <b>Bivalvia</b>                 |                        |                        |                        |             |
| <i>Heteranomia scuamula</i>     | 3±1.5                  | 13.9±9.4               | 2.0±0.7                | No          |
| <i>Hiatella arctica</i>         | –                      | 4.4±2.4                | 1.5±0.5                | No          |
| <i>Mytilus edulis</i>           | 1.3±0.3                | 1.4±0.2                | 2.1±0.6                | No          |
| <b>Copepoda</b>                 |                        |                        |                        |             |
| <i>Tisbe furcata</i>            | 79.3±18.3 <sup>a</sup> | 2.0±0.6 <sup>b</sup>   | 17.0±0.0*              | Significant |
| <b>Amphipoda</b>                |                        |                        |                        |             |
| <i>Ischyrocerus anguipes</i>    | 5.8±4.1                | 9.1±1.2                | 9.4±3.4                | No          |
| <i>Ischyrocerus commensalis</i> | 5.5±1.5 <sup>a</sup>   | 26.5±3.5 <sup>b</sup>  | 79.8±11.6 <sup>c</sup> | Significant |
| <b>Cirripedia</b>               |                        |                        |                        |             |
| <i>Balanus crenatus</i>         | –                      | 3.2±0.6                | 2.9±0.8                | No          |

Note. Mean values are presented with standard errors. Different letters indicate significant differences (Bonferroni test,  $p < 0.05$ ). \* – excluded from the analysis due to low sample size.
